# Supplementary material for: Long-Read Sequencing Identifies Single Nucleotide Variant Patterns of (TG) n Repeats Linked to CD36 Deficiency Phenotypes
Source: Research Square preprint supplement (doi:10.21203/rs.3.rs-7472047/v1), 2025-09-17
Supplement: Supplementary file 1 [file 2ad75c17575be324aaee9350.xlsx]

## Sheet: Supplemental Table 1
Supplemental Table 1. Sequences of primers used for CD36 LR-PCR amplification.
Primer name	Sequence (5'-3')	Coverage	Size, kb
Primer1	TGACACGCCAACCCCATTATTG	Intron 1～Intron 3	～10
	ACAGGAAGAGGAATACAACT
Primer2	GCAAGCTTAGAACATCAGGCAGA	Intron 3～Intron 5	～12.9
	GAAGAAATTGTACTTCATCCA
Primer3	CCTCTGAAGTGTCCAACTC	Intron 3～Intron 8	～13.7
	GAGTGGCAAATGATTAGATGTA
Primer4	GAAGAAATTGTACTTCATCCA	Intron 5～3'UTR	～14.8
	GCACAGGAATTTAAGGAAGAACAT
Primer5	CCAGTAGATAACACACAAGCAC	Intron 9～3'UTR	～9.3
	GCAACATTTTCAGGTCTGATGAA

## Sheet: Supplemental Table 2
Supplemental Table 2. Genotype identified in CD36-deficient blood donors.
Phenotypic Group	Sample No.	CD36 Haplotype Sequences
		Mutations in Haplotype 1	Mutations in Haplotype 2
Type I	1	c.1227delTATTGTGCCTAT	c.329delAC
	2	c.1156C>T;c.1409C>T	-
	3	c.329delAC	c.1227delTATTGTGCCTAT
	4	c.1229T>C	-
	5	-	c.430-1G>C
	6	c.1227delTATTGTGCCTAT	c.1227delTATTGTGCCTAT
	7	c.329delAC	c.1227delTATTGTGCCTAT
	8	c.1227delTATTGTGCCTAT	c.1156C>T;c.1409C>T
	9	-	c.1006+2T>G
	10	c.1156C>T	c.1227delTATTGTGCCTAT
	11	-	c.1227delTATTGTGCCTAT
	12	c.609+7A>G	c.430-2A>G
	13	c.1163A>T	-
	14	c.380C>T	c.1227delTATTGTGCCTAT
	15	c.1227delTATTGTGCCTAT	c.1156C>T
Type II	1	c.1227delTATTGTGCCTAT	c.609+7A>G
	2	-	c.681C>A
	3	-	c.1340insTCTT
	4	-	c.329delAC
	5	-	c.329delAC
	6	-	-
	7	-	-
	8	c.220C>T	-
	9	-	-
	10	-	c.1156C>T;c.1409C>T
	11	-	-
	12	-	c.1156C>T
	13	-	-
	14	-	c.847G>A
	15	c.1227delTATTGTGCCTAT	-
	16	-	-
	17	-	c.1227delTATTGTGCCTAT
	18	-	c.429+2T>TG
	19	c.275C>T	-
	20	c.1156C>T	-
	21	-	-
	22	-	-
	23	-	c.1227delTATTGTGCCTAT
	24	c.1340insTCTT	-
	25	c.329delAC	-
	26	c.329delAC	-
	27	-	c.329delAC
	28	-	-
	29	c.329delAC	-
	30	-	c.1227delTATTGTGCCTAT
